# Supplementary material
Source: publisher figshare collection journal article supplement (https://acs.figshare.com/ndownloader/files/17425538)

# Near-Infrared Excited Orthogonal Emissive Upconversion Nanoparticles for Imaging-Guided On-Demand Therapy

Ming Tang<sup>†,‡</sup>, Xiaohui Zhu<sup>\*,†</sup>, Yuehong Zhang<sup>†</sup>, Zeping Zhang<sup>‡</sup>, Zhiming Zhang<sup>†</sup>, Qingsong Mei<sup>§</sup>, Jing Zhang<sup>†</sup>, Minghong Wu<sup>†</sup>, Jinliang Liu<sup>\*,†</sup>, Yong Zhang<sup>\*,†,¶</sup>

<sup>†</sup> School of Environmental and Chemical Engineering, Shanghai University, Shanghai, China, 200444.

<sup>‡</sup> School of Life Sciences, Shanghai University, Shanghai, China, 200444.

<sup>§</sup> School of Biological and Medical Engineering, Hefei University of Technology, Hefei, China, 230009.

<sup>¶</sup> Department of Biomedical Engineering, Faculty of Engineering, National University of Singapore, Singapore 117583.

Corresponding Author:

\*E-mail: xhzhu@shu.edu.cn; liujl@shu.edu.cn; biezy@nus.edu.sg

## Supplementary Information

Supporting Information is available free of charge on ACS Publication website. The Supporting Information PDF contains Figure S1-S6, which depict additional results.

## Supporting Figure Captions

**Figure S1.** X-ray diffraction (XRD) patterns of NaErF<sub>4</sub>:Yb/Tm core **(a)**, NaErF<sub>4</sub>:Yb/Tm@NaYF<sub>4</sub>:Yb core-shell **(b)** and NaErF<sub>4</sub>:Yb/Tm@NaYF<sub>4</sub>:Yb@NaNdF<sub>4</sub>:Yb core-shell-shell **(c)** nanoparticles. The XRD patterns of β-NaErF<sub>4</sub> is used as reference for comparison.

**Figure S2. (a-c)** TEM images of NaErF<sub>4</sub>:Yb/Tm@NaYF<sub>4</sub>:Yb@NaYF<sub>4</sub>:10%Yb, xNd UCNPs with different Nd<sup>3+</sup> concentrations in the NaYF<sub>4</sub>:10%Yb, x%Nd outer shell: x=0, 45, and 90. **(d)** The intensity ratio of green to red upconversion emission at 808 nm with different Nd<sup>3+</sup> concentrations in the NaYF<sub>4</sub>:10%Yb, x%Nd outer shell: x=0, 45, and 90.

**Figure S3. (a).** UV-Vis absorption spectra of standard ZnPc solutions with different concentrations (10μg/mL, 7.5μg/mL, 5.0μg/mL, 2.5μg/mL and 1.25μg/mL). **(b).** The calibration curve (concentration vs. absorbance) was fitted by unweighted least-squares linear regression.

**Figure S4.** UV-Vis absorption spectra of supernatants of UCNPs@mSiO<sub>2</sub>-ZnPc nanophotosensitizers collected by centrifugation after they were soaked in deionized water, PBS buffer, ethanol and cell culture medium (DMEM) for 24 hours.

**Figure S5. (a).** Flow cytometric analysis of intracellular ROS for different groups: group 1: A549 cells with DCFH-DA (control), group 2: A549 cells incubated with UCNPs@mSiO<sub>2</sub>-ZnPc without laser irradiation, group 3: A549 cells incubated with UCNPs@mSiO<sub>2</sub>-ZnPc under 808 nm laser irradiation for 10 min (235 mW/cm<sup>2</sup>) and group 4: A549 cells incubated with UCNPs@mSiO<sub>2</sub>-ZnPc under 980 nm laser irradiation for 10 min (608 mW/cm<sup>2</sup>). The generation of intracellular ROS was monitored by an increase in fluorescence of DCF **(b)**.

**Figure S6.** *In vivo* UCL imaging of A549 tumor-bearing mice with UCNPs@mSiO<sub>2</sub>-ZnPc under 808 and 980 nm laser lights.

Figure S1

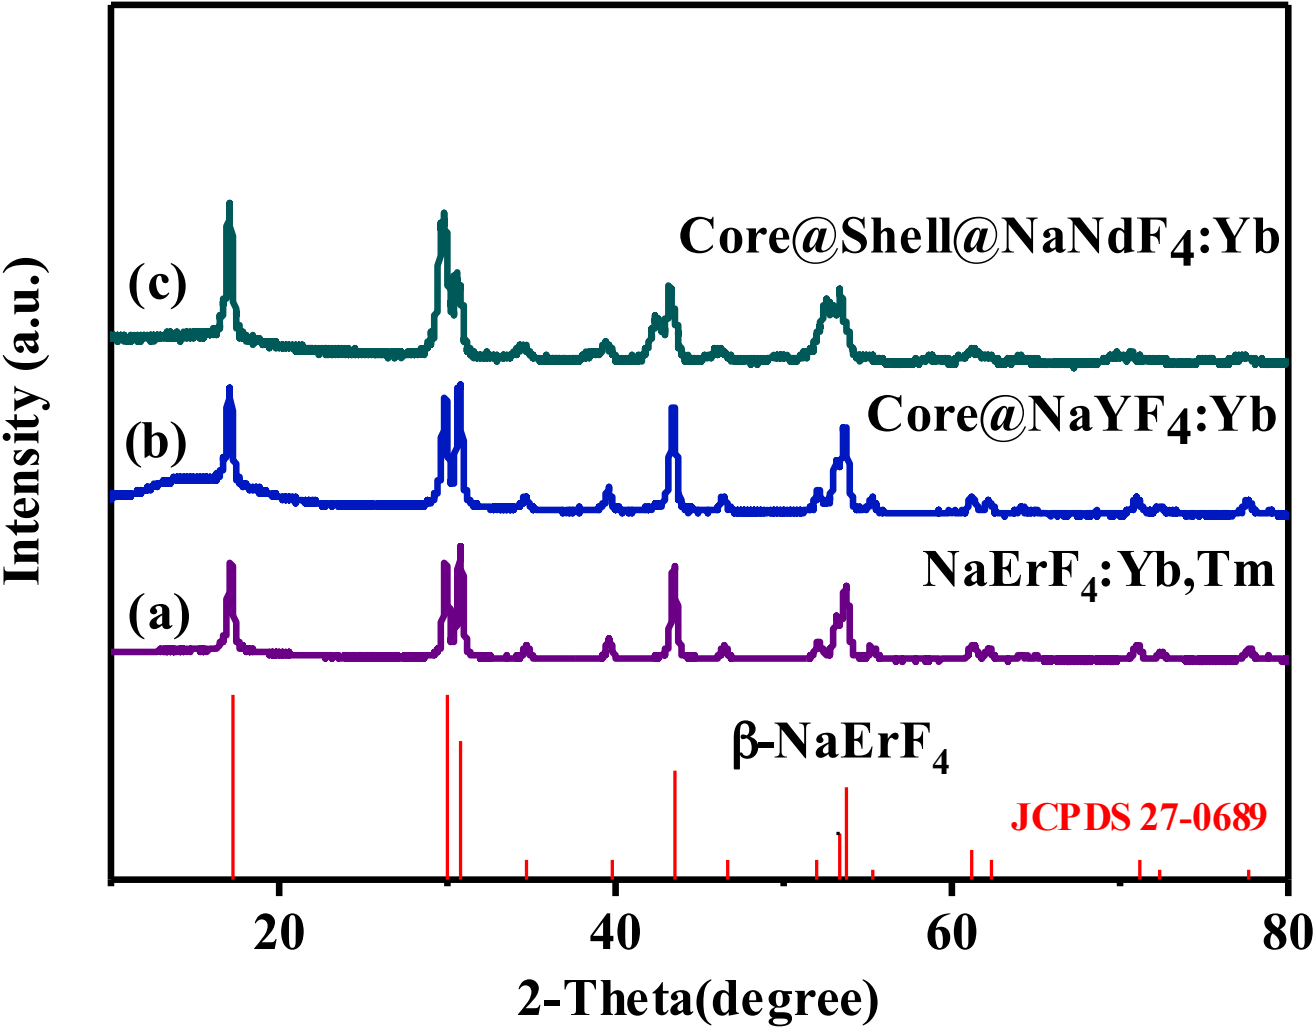

Figure S2

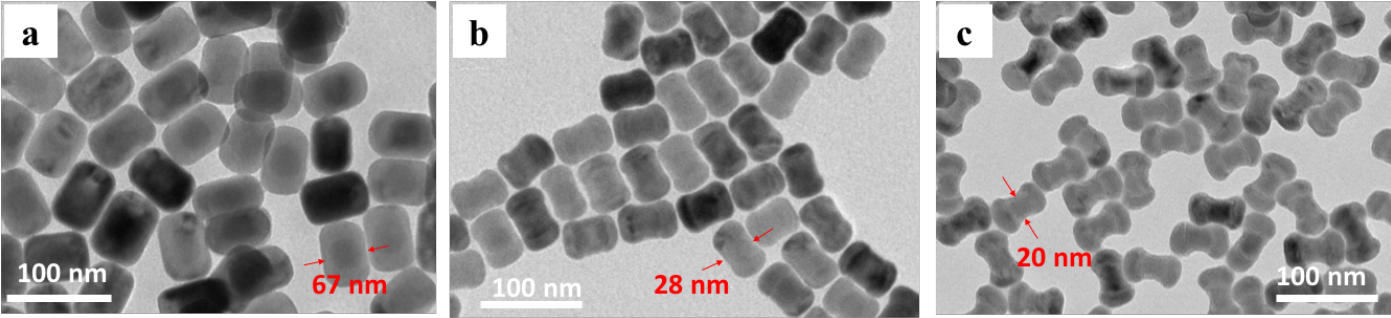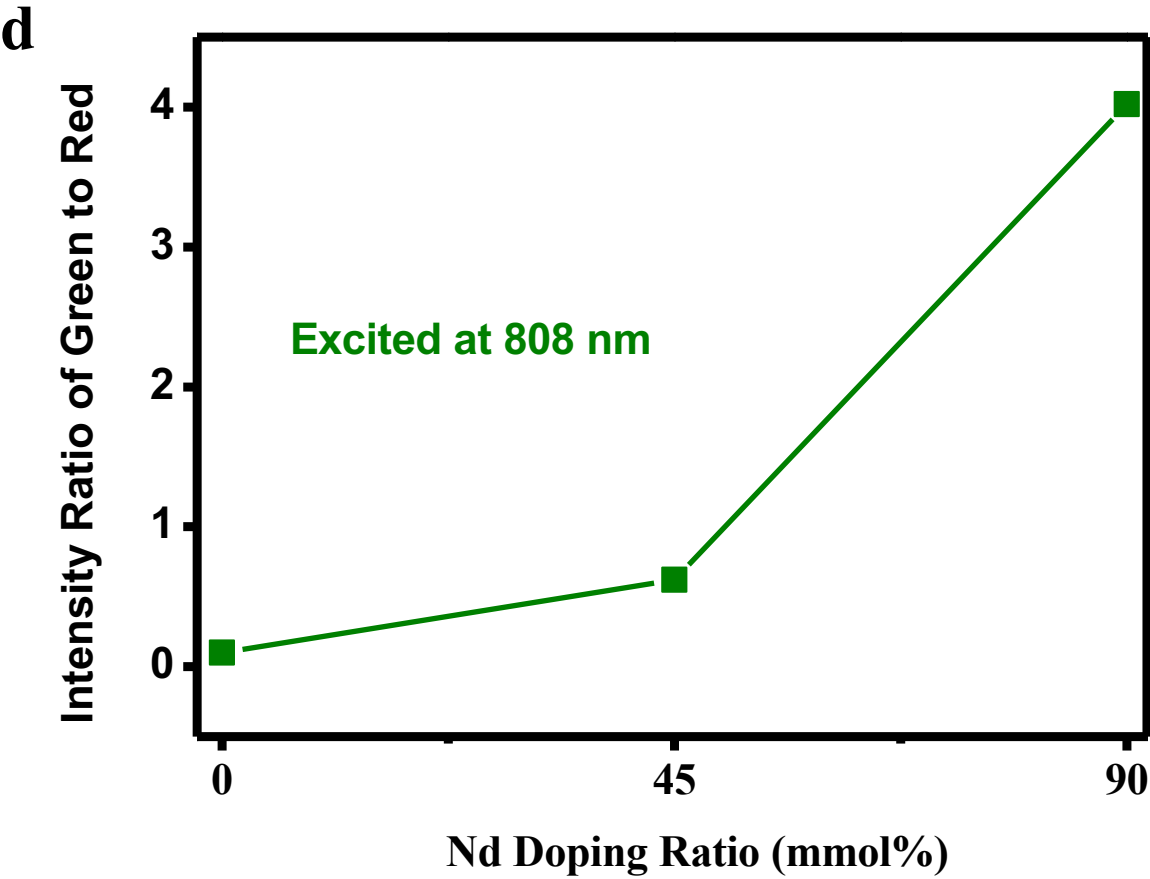

**Figure S3**

**a**

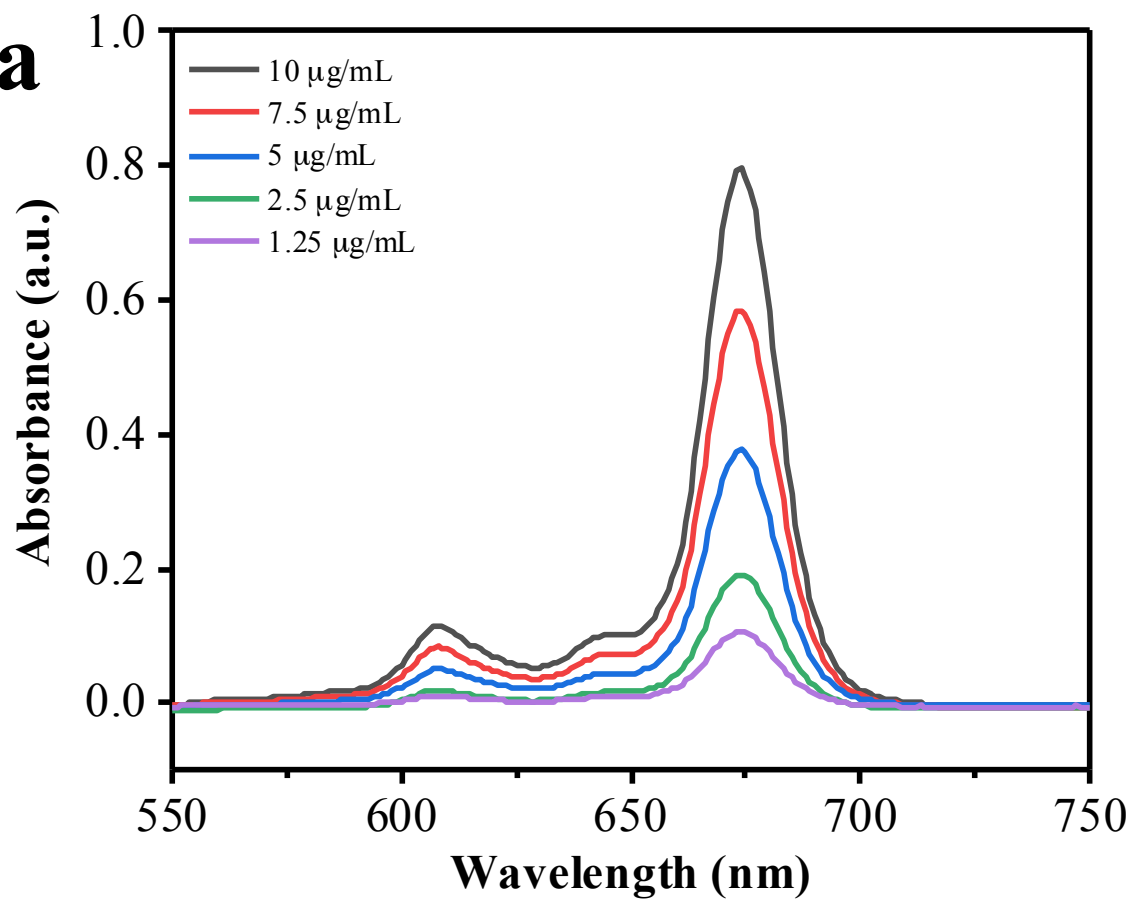

**b**

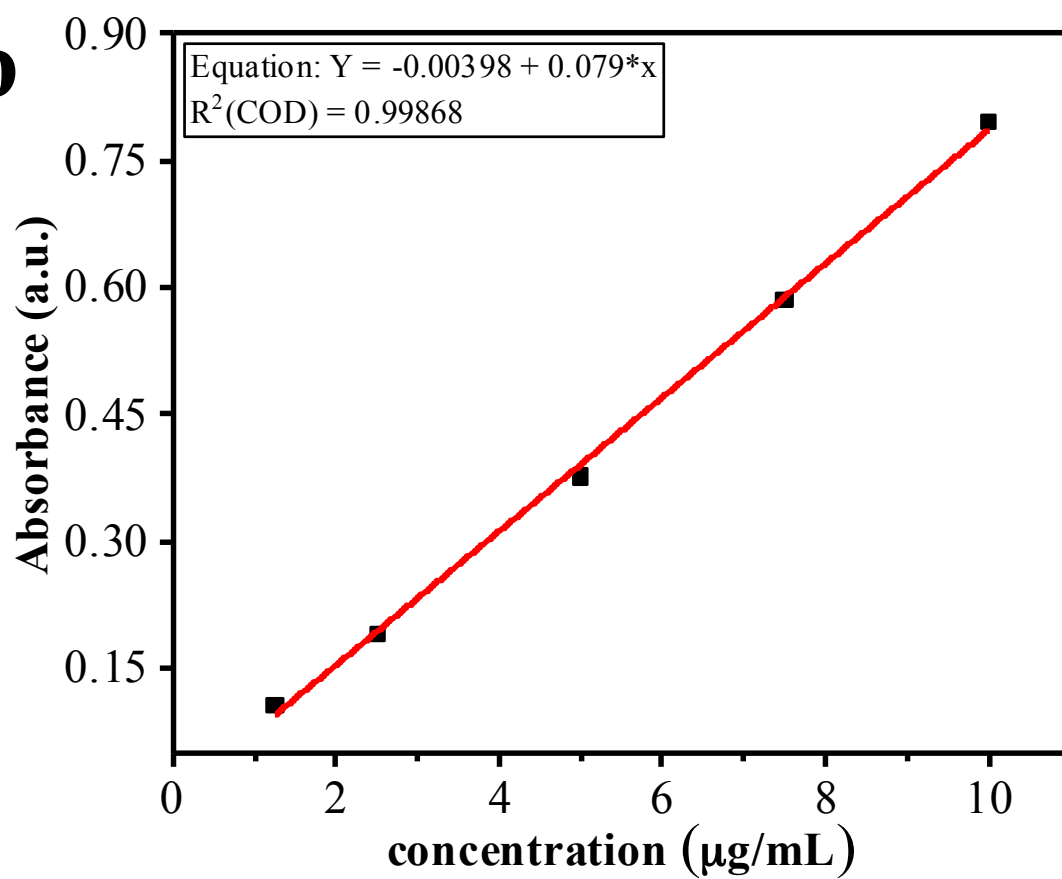

**Figure S4**

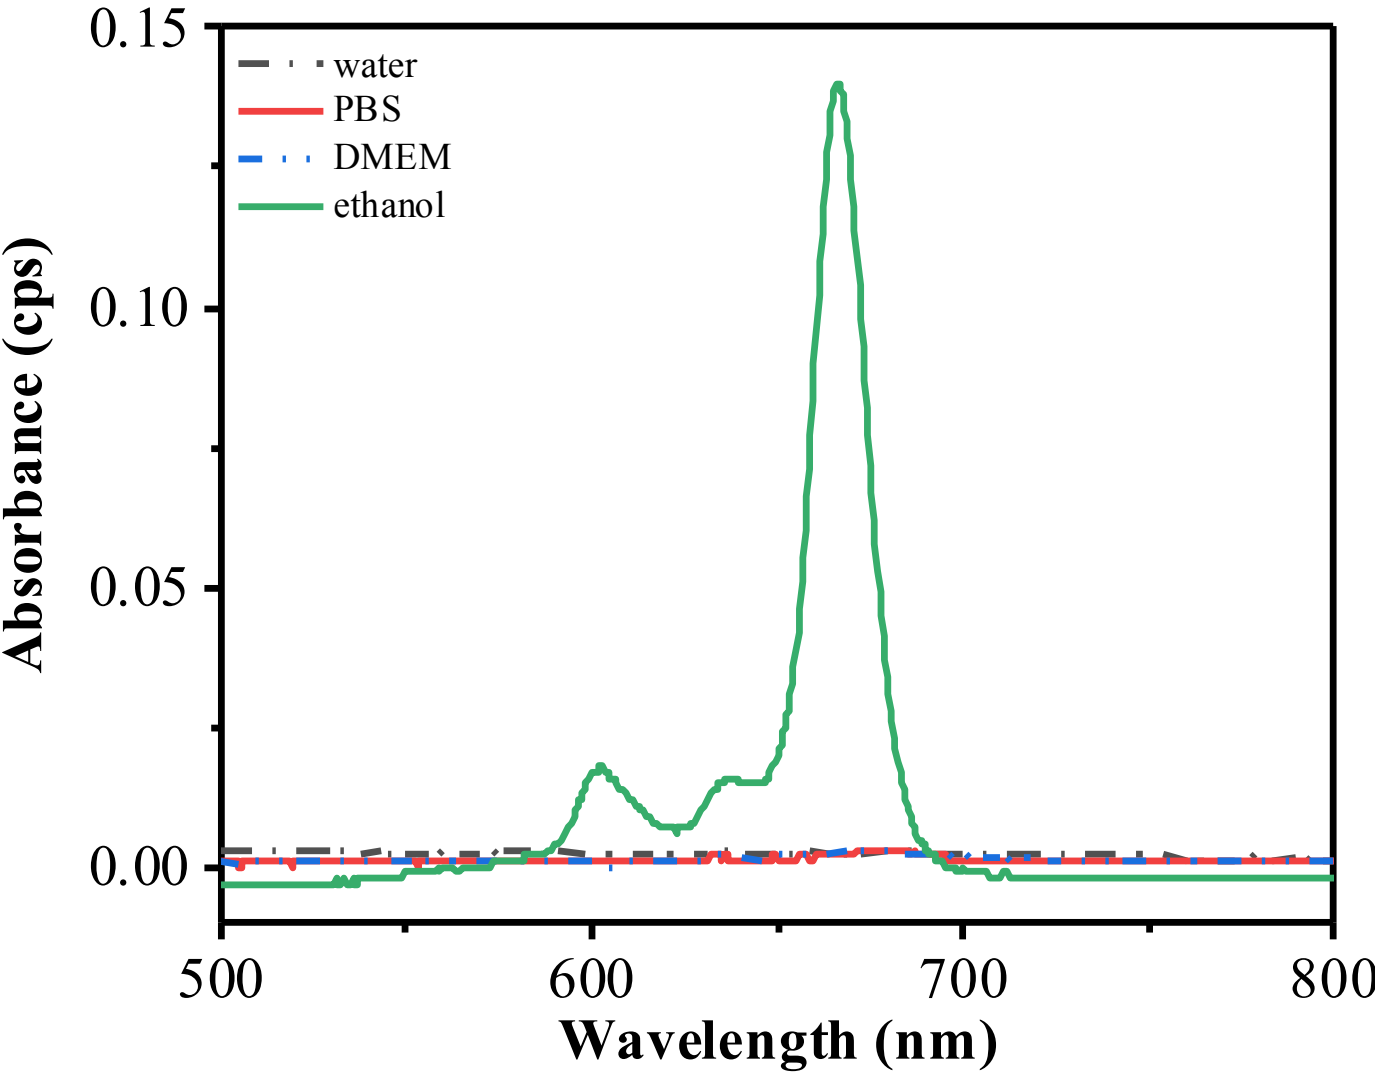

**Figure S5**

**a**

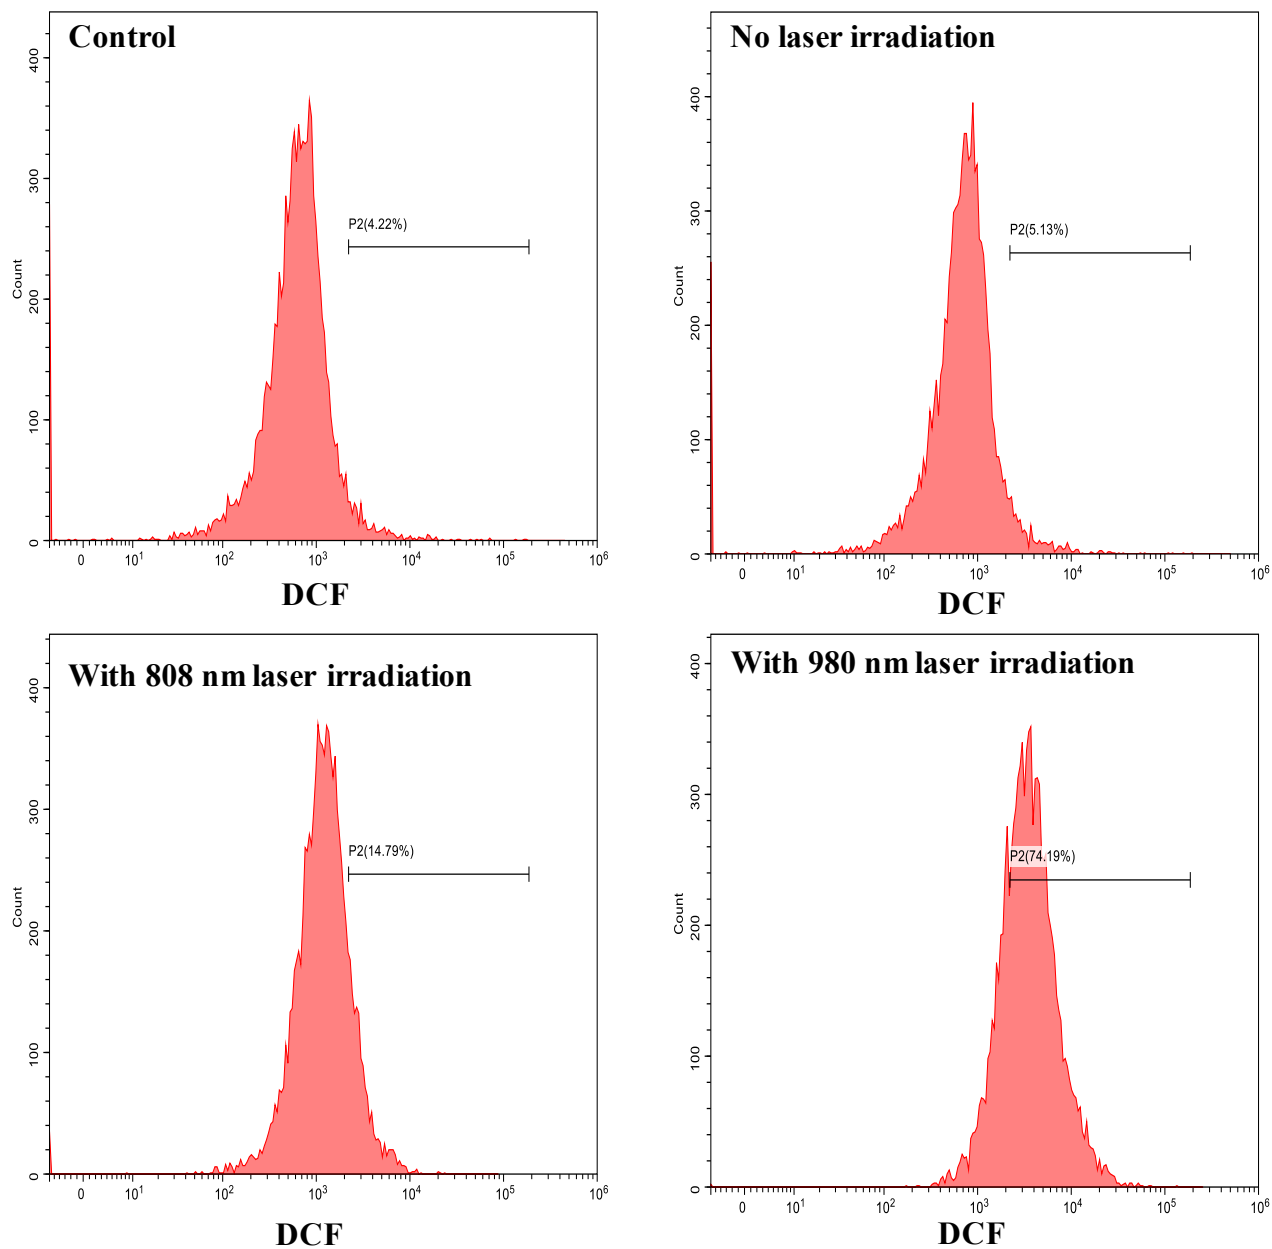

**b**

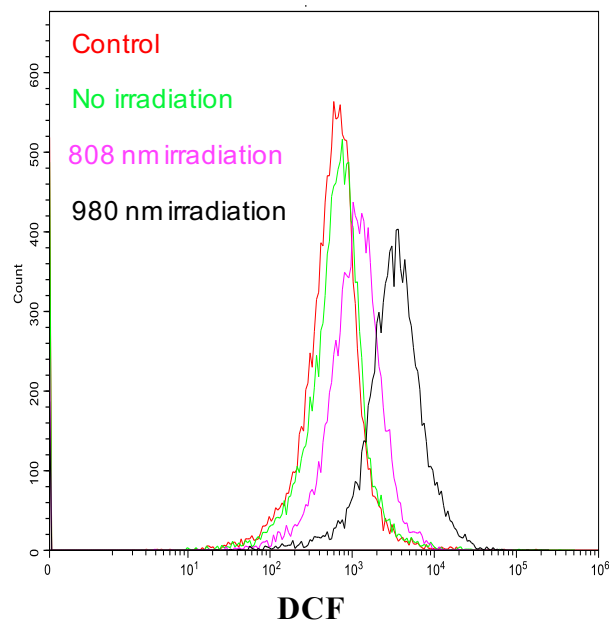

**Figure S6**

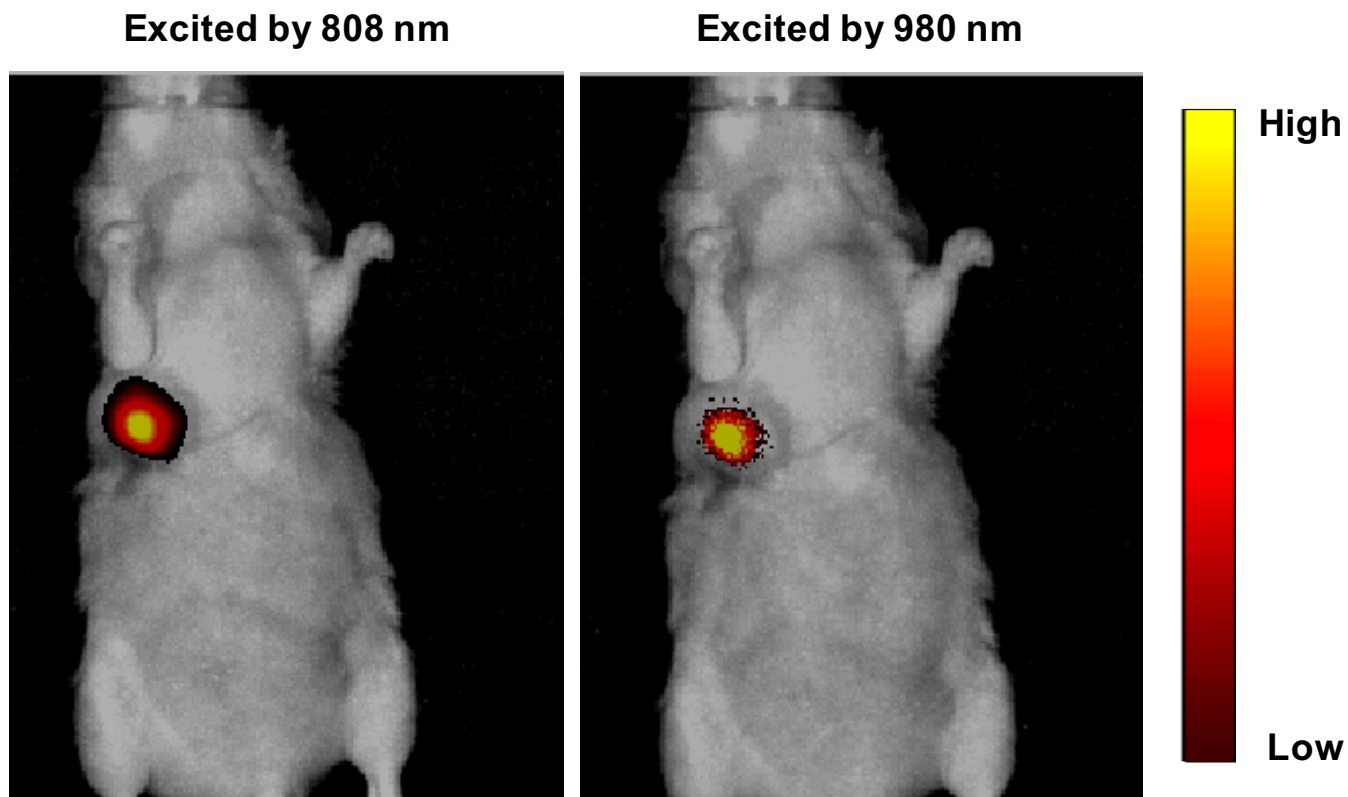

Supplement: Supplementary file 1 [file 17425538]
